# Supplementary material for: Lobe-Specific Analysis of Sublobar Lung Resection for NSCLC Patients with Tumors ≤ 2 cm
Source: MDPI journal article supplement (doi:10.3390/cancers14133265), 2022-07-04
Supplement: s1 [file s1]

**Table S1. Details of COX Regression Analysis**

| <b>Univariate COX Regression Analysis</b>   |                       | <b>HR (95% CI)</b>    | <b>P value</b> |
|---------------------------------------------|-----------------------|-----------------------|----------------|
| <b>Age</b>                                  |                       |                       |                |
|                                             | > 70y vs ≤ 70y        | 1.658 ( 1.371, 2.005) | <0.001         |
| <b>Sex</b>                                  |                       |                       |                |
|                                             | Female vs Male        | 0.560 ( 0.464, 0.675) | <0.001         |
| <b>Race</b>                                 |                       |                       | 0.309          |
|                                             | Black vs White        | 1.211 ( 0.815, 1.801) | 0.344          |
|                                             | Other vs White        | 0.658 ( 0.327, 1.324) | 0.240          |
| <b>Histology</b>                            |                       |                       | <0.001         |
|                                             | LUAD vs LUSC          | 0.546 ( 0.441, 0.677) | <0.001         |
|                                             | OC vs LUSC            | 0.476 ( 0.352, 0.644) | <0.001         |
| <b>Location</b>                             |                       |                       | 0.192          |
|                                             | RML vs RUL            | 1.064 ( 0.589, 1.924) | 0.837          |
|                                             | RLL vs RUL            | 0.787 ( 0.594, 1.042) | 0.094          |
|                                             | LUL vs RUL            | 0.980 ( 0.774, 1.241) | 0.869          |
|                                             | LLL vs RUL            | 0.764 ( 0.572, 1.022) | 0.070          |
| <b>Size</b>                                 |                       |                       |                |
|                                             | > 1 to 2 cm vs ≤ 1 cm | 1.051 ( 0.841, 1.315) | 0.661          |
| <b>No. of Resected Lymph Nodes</b>          |                       |                       | <0.001         |
|                                             | 1–3 vs Non            | 0.735 ( 0.574, 0.941) | 0.015          |
|                                             | ≥ 4 vs Non            | 0.602 ( 0.478, 0.759) | <0.001         |
|                                             | Other vs Non          | 0.573 ( 0.335, 0.979) | 0.042          |
| <b>Surgery Type</b>                         |                       |                       |                |
|                                             | Wed vs Seg            | 1.274 ( 1.056, 1.538) | 0.012          |
| <b>Multivariate COX Regression Analysis</b> |                       | <b>HR (95% CI)</b>    | <b>P value</b> |
| <b>Age</b>                                  |                       |                       |                |
|                                             | > 70y vs ≤ 70y        | 1.579 ( 1.303, 1.914) | <0.001         |
| <b>Sex</b>                                  |                       |                       |                |
|                                             | Female vs Male        | 0.579 ( 0.477, 0.695) | <0.001         |
| <b>Histology</b>                            |                       |                       | <0.001         |
|                                             | LUAD vs LUSC          | 0.626 ( 0.503, 0.778) | <0.001         |
|                                             | OC vs LUSC            | 0.565 ( 0.416, 0.768) | <0.001         |
| <b>No. of Resected Lymph Nodes</b>          |                       |                       | 0.001          |
|                                             | 1–3 vs Non            | 0.803 ( 0.626, 1.030) | 0.084          |
|                                             | ≥ 4 vs Non            | 0.632 ( 0.501, 0.798) | <0.001         |
|                                             | Other vs Non          | 0.537 ( 0.314, 0.920) | 0.024          |
| <b>Surgery Type</b>                         |                       |                       |                |
|                                             | Wed vs Seg            | 1.233 ( 1.021, 1.489) | 0.030          |
